# Supplementary material
Source: publisher site journal article supplement (https://www.dovepress.com/article/437733)
Supplement: Supplementary file 1 [file get_supplementary_file.php]

| **Groups** | **WBC** | **Lymph** | **Gran** | **RBC** | **HGB** | **PLT** |
| --- | --- | --- | --- | --- | --- | --- |
| 109/ L | （%） | （%） | 1012/ L | g/l | 109/ L |
| Normal | 6.2 | 55.8 | 40.7 | 10.1 | 101 | 172 |
| PBS | 288.9 | 45.9 | 85.4 | 6.8 | 89 | 159 |
| Rh2 | 258.1 | 48.4 | 80.9 | 5.1 | 79 | 156 |
| Rh2-lipo | 275.7 | 49.2 | 86.8 | 6.2 | 95 | 176 |
| Abraxane | 268.3 | 48.7 | 79.2 | 7.1 | 91 | 163 |
| Lipusu | 277.1 | 45.8 | 83.4 | 6.3 | 94 | 168 |
| PTX-Rh2-lipo | 269.2 | 48.5 | 86.6 | 6.7 | 88 | 173 |

**Table S1**. Blood hematology tests in tumor bearing mice with different treatment.
